# Supplementary material
Source: ML conference proceedings conference paper supplement (https://openreview.net/forum?id=SQouRKRIXY)
Supplement: supplementary_material [file attachment]

---

# MomentDiff: Generative Video Moment Retrieval from Random to Real (Supplementary Material)

---

Anonymous Author(s)

Affiliation

Address

email

1 This supplementary material provides more details of our MomentDiff framework:

- 2 1. Implementation details.
- 3 2. Inference efficiency of MomentDiff.
- 4 3. More experiment results.
- 5 4. Broader impacts.

## 6 1 Implementation details

### 7 1.1 Datasets

8 **Public datasets.** **Charades-STA** [1] serves as a benchmark dataset for the video moment retrieval  
9 task and is built upon the Charades dataset, originally collected for video action recognition and  
10 video captioning. The Charades-STA dataset comprises 6,672 videos and 16,128 video-query pairs,  
11 allocated for training (12,408 pairs) and testing (3,720 pairs). On average, the videos in this dataset  
12 have a duration of 29.76 seconds. Each video is annotated with an average of 2.4 moments, with  
13 each moment lasting approximately 8.2 seconds. **QVHighlights** [2] contains 10,148 videos, each  
14 150 seconds long and annotated with at least one text query describing its relevant content. These  
15 videos are from three main categories, daily vlogs, travel vlogs, and news events. On average, there  
16 are approximately 1.8 non-overlapping moments per query, annotated on 2s non-overlapping clips.  
17 The dataset contains a total of 10,310 queries with 18,367 annotated moments. The training set,  
18 validation set and test set include 7,218, 1,550 and 1,542 video-text pairs, respectively. **TACoS** [3]  
19 is compiled specifically for video moment retrieval and dense video captioning tasks. It is comprised of  
20 127 videos that depict cooking activities, with an average duration of 4.79 minutes. TACoS contains  
21 a total of 18,818 video-query pairs. In comparison to the Charades-STA dataset, TACoS has more  
22 video segments that are temporally annotated with queries per video. On average, each video contains  
23 148 queries. Additionally, the TACoS dataset is known for its difficulty, as the queries it contains are  
24 limited to only a few seconds or even just a few frames. To ensure impartial comparisons, we use the  
25 same dataset split [4], which consists of 10,146, 4,589, and 4,083 video-query pairs for the training,  
26 validation, and testing sets, respectively.

Table 1: Training and test sets on two anti-bias datasets.

| Dataset  | Charades-STA-Len |             |       | Charades-STA-Mom       |                     |       |
|----------|------------------|-------------|-------|------------------------|---------------------|-------|
|          | $w_0 \leq 10s$   | $w_0 > 10s$ | Total | $c_0 + w_0/2 \leq 15s$ | $c_0 - w_0/2 > 15s$ | Total |
| Training | 9307             | 2326        | 11633 | 5330                   | 1332                | 6662  |
| Test     | 197              | 788         | 985   | 259                    | 1038                | 1297  |

27 **Anti-bias datasets.** To explore the location bias problem, we construct two anti-bias datasets with  
 28 location distribution shifts based on the Charades-STA dataset. In video moment retrieval, length and  
 29 position are important parameters of spans.

30 Therefore, we first investigate the effect of span length  $w_0$ . As shown in Tab. 1, in the training  
 31 set of Charades-STA-Len, we collect 9,307 video-text pairs with span length  $w_0 \leq 10s$  and 2,326  
 32 video-text pairs with  $w_0 > 10s$ , accounting for 80% and 20% of the total training set. In contrast, in  
 33 the test set, we select 197 video-text pairs with  $w_0 \leq 10s$  and 788 video-text pairs with  $w_0 > 10s$ ,  
 34 accounting for 20% and 80% of the total test set.

35 Then, we design the dataset Charades-STA-Mom based on the span’s end time  $c_0 + w_0/2$  and start  
 36 time  $c_0 - w_0/2$ . In the training set of Charades-STA-Mom, we collect 5,330 video-text pairs with  
 37  $c_0 + w_0/2 \leq 15s$  and 1,332 video-text pairs with  $c_0 - w_0/2 > 15s$ , accounting for 80% and 20% of  
 38 the total training set. In contrast, in the test set, we select 259 video-text pairs with  $c_0 + w_0/2 \leq 15s$   
 39 and 788 video-text pairs with  $c_0 - w_0/2 > 15s$ , accounting for 20% and 80% of the total test set.

---

**Algorithm 1:** MomentDiff Training in a PyTorch-like style.

---

```

# Video features: v_feats ∈ ℝNv × D
# Text features: t_feats ∈ ℝNt × D
# Ground truth spans: gt_spans: [*, 2]
# alpha_cumprod(m): cumulative product of αi
# Fully-connected layer: FC()
# Video Moment Denoiser: VMD()
def train(v_feats, t_feats, gt_spans):
    # Similarity-aware Condition Generator
    f_feats = SCG(v_feats, t_feats) # Nv × D

    # Span normalization
    ps = pad_spans(gt_spans) # Pad gt_spans to [Nr, 2]
    ps = (ps * 2 - 1) * λ # Signal scaling
    m = randint(0, M) # Noise intensity
    noi = normal(mean=0, std=1) # Noise
    ps_m = sqrt(alpha_cumprod(m)) * ps +
           sqrt(1 - alpha_cumprod(m)) * noi # Noisy span
    ps_m = (ps_m/λ + 1)/2 # Normalization

    # Span embedding
    ps_emb_m = FC(ps_m)

    # Intensity-aware attention
    output_m = VMD(ps_emb_m, m, f_feats) # Output embedding

    # Denoising training
    hat_ps_m = Span_pred(output_m) # Predicted span
    hat_cs_m = Score_pred(output_m) # Confidence score
    # Computing loss
    loss = loss_sim(f_feats) + loss_vmr(hat_ps_m, hat_cs_m, gt_spans)

    return loss

```

---

40 **1.2 Pseudo Code of MomentDiff**

41 Algorithm 1 provides the pseudo-code of MomentDiff Training in a PyTorch-like style.

42 The inference procedure of MomentDiff is a denoising sampling process from noise to temporal  
 43 spans. Starting from spans sampled in Gaussian distribution, the model progressively refines its  
 44 predictions, as shown in Algorithm 2.

---

**Algorithm 2:** MomentDiff inference in a PyTorch-like style.

---

```
# Video features: v_feats ∈ ℝNv × D
# Text features: t_feats ∈ ℝNt × D
# Video Moment Denoiser: VMD()
def test(v_feats, t_feats, sampling_num):
    # Similarity-aware Condition Generator
    f_feats = SCG(v_feats, t_feats) # Nv × D

    # Noisy span:[Nr, 2]
    ps_m = normal(mean=0, std=1)

    # uniform sample
    intensity = reversed(linespace(-1, M, sampling_num))
    # [(M-1, M-2), (M-2, M-3), ..., (1, 0), (0, -1)]
    intensity_pairs = list(zip(intensity[:-1], intensity[1:]))

    for intensity_now, intensity_next in zip(intensity_pairs):
        # predict ps_0 from ps_m
        output_m = VMD(ps_m, f_feats, intensity_now)
        # Predicted span
        hat_ps_m = Span_pred(output_m)
        # Update ps_m
        ps_m = ddim_update(hat_ps_m, ps_m, intensity_now, intensity_next)

    # Confidence score
    hat_cs_m = Score_pred(output_m)

    return hat_ps_m, hat_cs_m
```

---

Table 2: The inference time of 2DTAN [5], MMN [6], MomentDETR [2] and MomentDiff on Charades-STA with VGG video features and Glove text features. We report R1@0.5, R1@0.7 and MAP<sub>avg</sub>. Default settings are marked in blue .

| Method                | Charades-STA |              |                    | Inference time<br>(second) |
|-----------------------|--------------|--------------|--------------------|----------------------------|
|                       | R1@0.5       | R1@0.7       | MAP <sub>avg</sub> |                            |
| 2DTAN [5]             | 41.34        | 23.91        | 29.26              | 42.18                      |
| MMN [6]               | 46.93        | 27.07        | 31.58              | 53.42                      |
| MomentDETR [2]        | 50.54        | 28.01        | 29.87              | 12.42                      |
| MomentDiff (Step=1)   | 49.17        | 26.39        | 29.12              | 7.56                       |
| MomentDiff (Step=2)   | 50.81        | 27.84        | 31.27              | 8.23                       |
| MomentDiff (Step=10)  | <b>52.36</b> | 28.08        | <b>31.75</b>       | 11.01                      |
| MomentDiff (Step=50)  | 51.94        | 28.25        | 31.66              | 20.74                      |
| MomentDiff (Step=100) | 52.21        | <b>28.84</b> | 31.01              | 34.35                      |

## 45 2 Inference Efficiency of MomentDiff

46 **Inference time.** Inference efficiency is critical for machine learning models. We test 2DTAN [5],  
47 MMN [6], MomentDETR [2] and MomentDiff on the Pytorch framework [7] in Tab. 2. We test all  
48 models with one NVIDIA Tesla A100 GPU.

49 Compared with 2DTAN [5] and MMN [6], MomentDiff (Step=1) not only achieves the best results  
50 on recall, but also improves the inference speed by 5-7 times. This is because 2DTAN and MMN  
51 predefine a large number of proposals, which may be redundant and increase computational overhead.  
52 Compared to MomentDETR [2], MomentDiff (Step=10) achieves better results with similar inference  
53 time. The possible reasons are that we adopt fewer random spans, very simple network structures,  
54 and avoid post-processing.

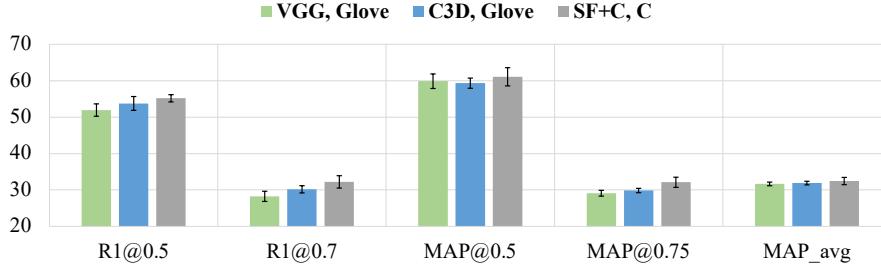

Figure 1: Performance fluctuations (%) corresponding to different features and multiple random seeds on the Charades-STA dataset.

Table 3: Ablation study (%) on the Charades-STA dataset with SF+C video features and CLIP text features. We report R1@0.5, R1@0.7 and MAP<sub>avg</sub>. Default settings are marked in blue .

| (a) Different sampling strategies. |              |              |                    | (b) Effect of the schedule of $\beta$ . |              |              |                    |
|------------------------------------|--------------|--------------|--------------------|-----------------------------------------|--------------|--------------|--------------------|
| Sampling                           | R1@0.5       | R1@0.7       | MAP <sub>avg</sub> | Schedule                                | R1@0.5       | R1@0.7       | MAP <sub>avg</sub> |
| DDPM [8]                           | <b>55.62</b> | 32.37        | 32.48              | Linear                                  | 54.76        | 31.43        | 31.59              |
| DDIM [9]                           | 55.57        | <b>32.42</b> | <b>32.85</b>       | Cosine                                  | <b>55.57</b> | <b>32.42</b> | <b>32.85</b>       |

  

| (c) Effect of the Box Renewal [10]. |              |              |                    | (d) Effect of the batch size. |              |              |                    |
|-------------------------------------|--------------|--------------|--------------------|-------------------------------|--------------|--------------|--------------------|
| Schedule                            | R1@0.5       | R1@0.7       | MAP <sub>avg</sub> | batch size                    | R1@0.5       | R1@0.7       | MAP <sub>avg</sub> |
| w/o Box Renewal                     | 55.57        | 32.42        | 32.85              | 16                            | 52.42        | 30.81        | 30.14              |
| w/ Box Renewal                      | <b>56.03</b> | <b>32.64</b> | <b>33.18</b>       | 32                            | <b>55.57</b> | <b>32.42</b> | <b>32.85</b>       |
|                                     |              |              |                    | 64                            | 53.78        | 32.25        | 31.93              |

  

| (e) Effect of the number of spans on R1@0.5. |       |       |       |              |       |       |
|----------------------------------------------|-------|-------|-------|--------------|-------|-------|
| train \ test                                 | 1     | 3     | 5     | 10           | 20    |       |
|                                              | 1     | 50.83 | 50.91 | 50.97        | 50.87 | 50.82 |
| 3                                            | 53.98 | 54.12 | 54.19 | 54.23        | 54.21 |       |
| 5                                            | 55.36 | 55.41 | 55.57 | <b>55.69</b> | 55.51 |       |
| 10                                           | 53.71 | 53.84 | 53.86 | 53.89        | 53.93 |       |
| 20                                           | 53.16 | 53.38 | 53.40 | 53.44        | 53.42 |       |

### 55 3 More Experiment Results

#### 56 3.1 Error bars

57 Fig. 1 shows the performance fluctuation of the model on the Charades-STA dataset. We use different  
 58 random seeds (seed= 2023, 2022, 2021, 2020, 2019) and different features (VGG, Glove; C3D,  
 59 Glove; SF+C, C;) to organize experiments. This shows that the model always converges and achieves  
 60 stable results for different initializations. This phenomenon demonstrates the ability of the model to  
 61 learn to generate real spans from arbitrary random spans.

#### 62 3.2 Ablation study

63 **Different sampling strategies.** Denoising Diffusion Probabilistic Models (DDPM) [8] and Denoising  
 64 Diffusion Implicit Models (DDIM) [9] are popular and classic diffusion models. We show the results  
 65 of both strategies in Tab. 3(a). We find that DDIM and DDPM perform similarly, but DDIM samples  
 66 faster. Therefore we adopt DDIM as the default technology.

67 **Effect of the schedule of  $\beta$ .** The schedule of  $\beta$  determines the weighting ratio of different intensity  
 68 noises. In Tab. 3(b), we find that the cosine schedule works better in our experiment. The cosine

69 schedule makes the noisy spans change slowly at the beginning and end during the diffusion process,  
70 and the generation effect is more stable. So we set the cosine schedule as the default.

71 **Effect of the Box Renewal.** Box Renewal is a post-processing technique in DiffusionDet [10].  
72 Tab. 3(c) shows that Box Renewal can indeed slightly improve the results. To keep the inference  
73 process as simple as possible, we do not use Box Renewal by default.

74 **Effect of the batch size.** As shown in Tab. 3(d), we set the batch size to 32 to achieve the best results.

75 **Effect of the number of spans on R1@0.5.** Our training and inference are decoupled. Our simple  
76 framework allows us to input any number of random noises. Tab. 3(e) shows that there is a slight  
77 improvement when testing with more noise boxes.

## 78 4 Broader Impacts

79 First, our work does not involve private data. Second, we believe that AI is a double-edged sword,  
80 and our model is no exception. For example, when users or websites use our model, only natural  
81 language is needed to locate video moments and collect desired video material, which improves the  
82 productivity of society. However, this may have a negative impact if the natural language entered by  
83 the user contains words related to violence, pornography, etc. We will consider these scenarios and  
84 implement a more secure VMR model.

## 85 References

- 86 [1] Gao, J., C. Sun, Z. Yang, et al. Tall: Temporal activity localization via language query. In *ICCV*,  
87 pages 5267–5275. 2017.
- 88 [2] Lei, J., T. L. Berg, M. Bansal. Qvhighlights: Detecting moments and highlights in videos via  
89 natural language queries. In *NeurIPS*. 2021.
- 90 [3] Regneri, M., M. Rohrbach, D. Wetzell, et al. Grounding action descriptions in videos. *TACL*,  
91 1:25–36, 2013.
- 92 [4] Zeng, R., H. Xu, W. Huang, et al. Dense regression network for video grounding. In *CVPR*,  
93 pages 10287–10296. 2020.
- 94 [5] Zhang, S., H. Peng, J. Fu, et al. Learning 2d temporal adjacent networks for moment localization  
95 with natural language. In *AAAI*, pages 12870–12877. 2020.
- 96 [6] Wang, Z., L. Wang, T. Wu, et al. Negative sample matters: A renaissance of metric learning for  
97 temporal grounding. In *AAAI*, pages 2613–2623. 2022.
- 98 [7] Paszke, A., S. Gross, F. Massa, et al. Pytorch: An imperative style, high-performance deep  
99 learning library. In *NeurIPS*. 2019.
- 100 [8] Ho, J., A. Jain, P. Abbeel. Denoising diffusion probabilistic models. In *NeurIPS*. 2020.
- 101 [9] Song, J., C. Meng, S. Ermon. Denoising diffusion implicit models. In *ICLR*. 2021.
- 102 [10] Chen, S., P. Sun, Y. Song, et al. Diffusiondet: Diffusion model for object detection.  
103 abs/2211.09788, 2022.
